# Supplementary material for: Molecular and mesoscale mechanism for hierarchical self-assembly of dipeptide and porphyrin light-harvesting system
Source: Royal Society of Chemistry journal article supplement (doi:10.1039/c6cp01358a), 2016-01-01
Supplement: c6cp01358a1.pdf [file c6cp01358a1.pdf]

# **Molecular and Mesoscale Mechanism for Hierarchical Self-Assembly of Dipeptide and Porphyrin Light-Harvesting System**

*Kai Liu<sup>1,2</sup>, Yu Kang<sup>3\*</sup>, Guanghui Ma<sup>1</sup>, Helmuth Möhwald<sup>4</sup>, Xuehai Yan<sup>1,2,\*</sup>*

1 State Key Laboratory of Biochemical Engineering, Institute of Process Engineering, Chinese Academy of Sciences, Beijing 100190, China

2 Center for Mesoscience, Institute of Process Engineering, Chinese Academy of Sciences, Beijing 100190, China

3 College of Pharmaceutical Sciences, Zhejiang University, Hangzhou, Zhejiang 310058, China

4 Max Planck Institute of Colloids and Interfaces, Am Mühlenberg 1, Potsdam/Golm 14476, Germany

## **Corresponding Author**

\*Email: [yanxh@ipe.ac.cn](mailto:yanxh@ipe.ac.cn); [yukang@zju.edu.cn](mailto:yukang@zju.edu.cn)

Homepage: <http://www.yan-assembly.org/>

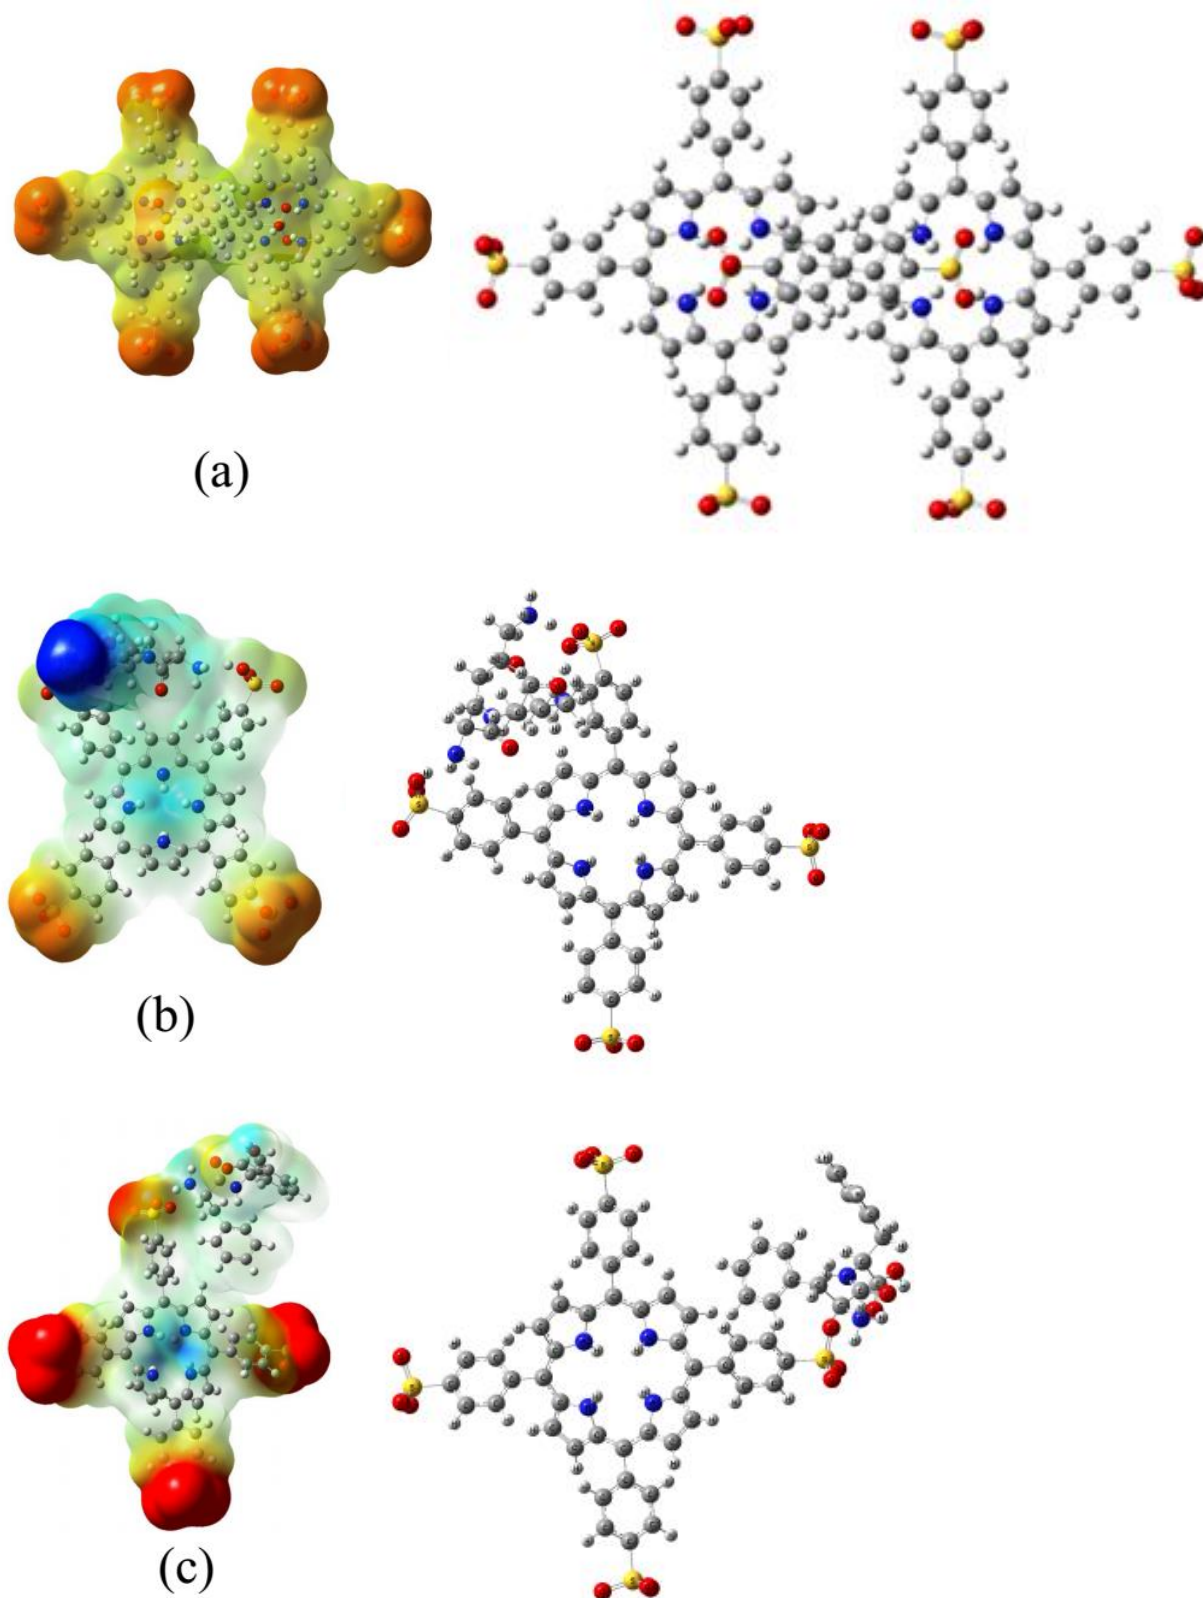

**Figure S1.** Models for molecular clusters and electrostatic surface potential. Clusters of (a) two  $\text{H}_2\text{TPPS}^{2-}$  molecules, (b) one  $\text{H}_2\text{TPPS}^{2-}$  molecule and one  $\text{KK}^{3+}$  molecule and (c) one  $\text{H}_2\text{TPPS}^{2-}$  molecule and one  $\text{FF}^+$  molecule.

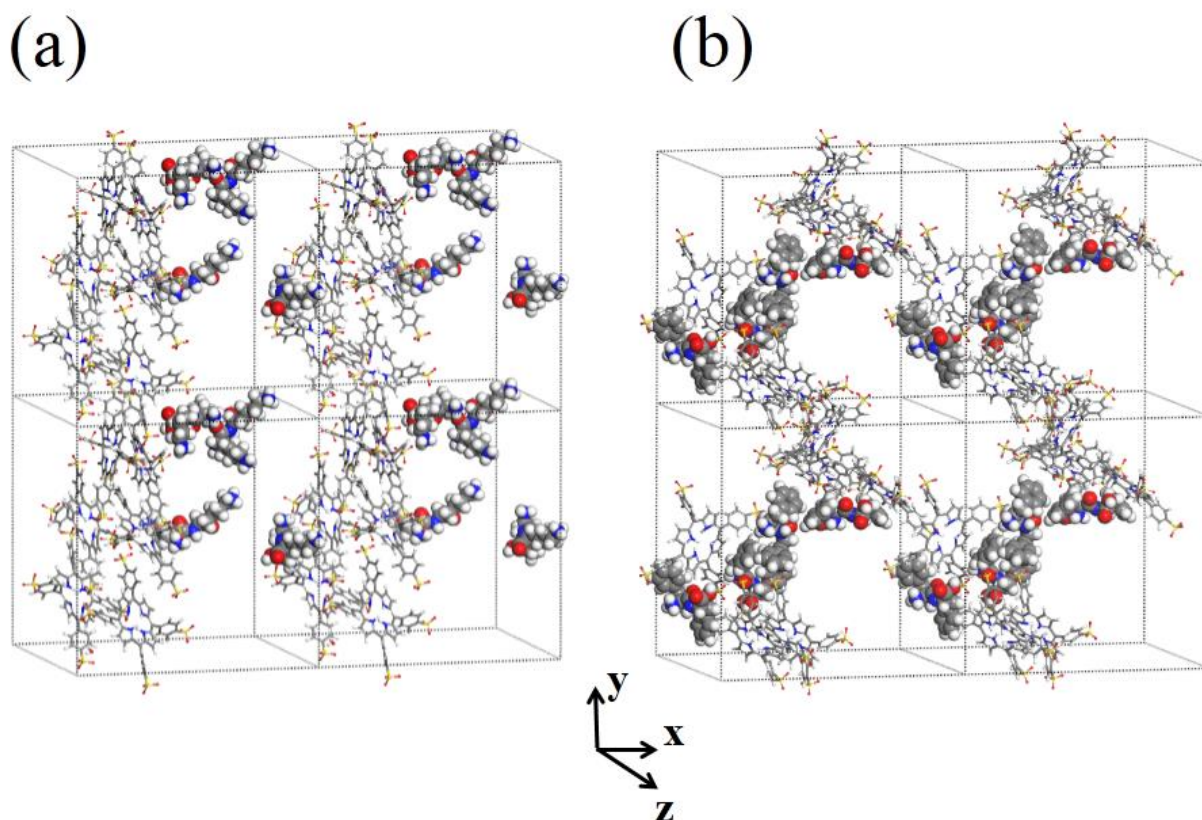

**Figure S2.** Structure of assembled (a)  $\text{H}_2\text{TPPS}^{2-}$  and  $\text{KK}^{3+}$  (b)  $\text{H}_2\text{TPPS}^{2-}$  and  $\text{FF}^+$  from MD Simulation. Water molecules are omitted. The CPK model has been used for dipeptides, and the line model has been used for  $\text{H}_2\text{TPPS}^{2-}$ .

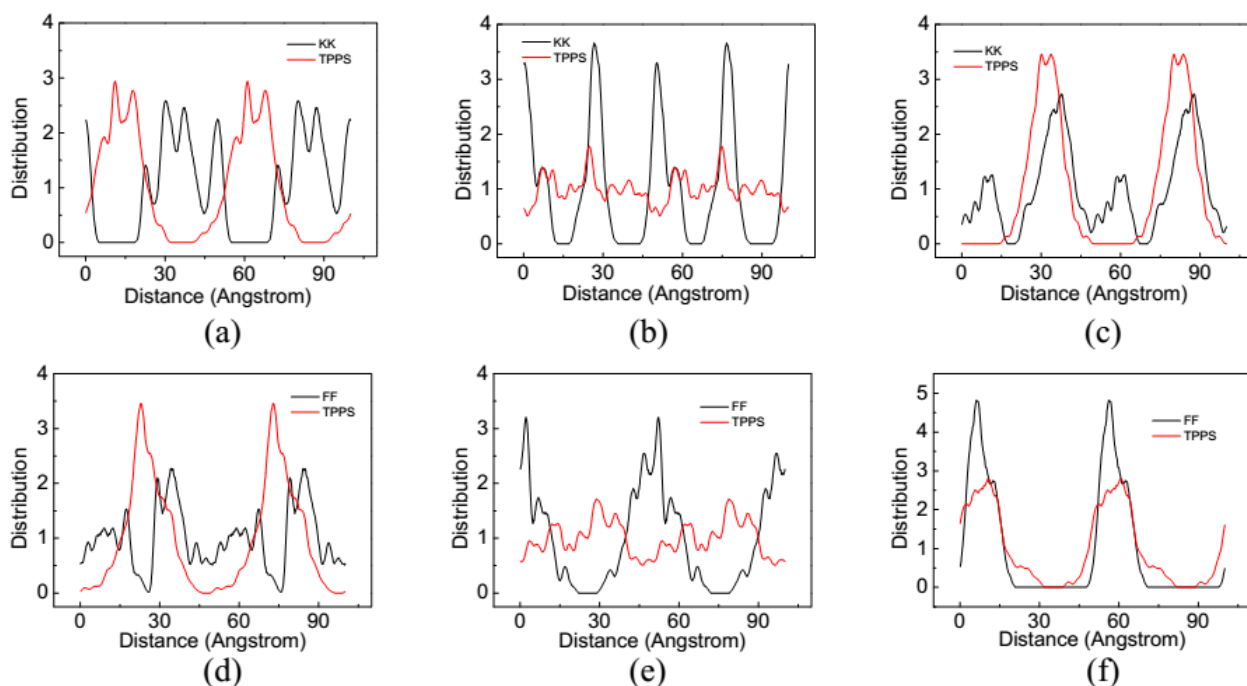

**Figure S3.** Distribution of species (a) along the x axis in the  $\text{H}_2\text{TPPS}^{2-}\text{-KK}^{3+}$  system, (b) along the y axis in the  $\text{H}_2\text{TPPS}^{2-}\text{-KK}^{3+}$  system, (c) along the z axis in the  $\text{H}_2\text{TPPS}^{2-}\text{-KK}^{3+}$  system, (d) along the x axis in the  $\text{H}_2\text{TPPS}^{2-}\text{-FF}^+$  system, (e) along the y axis in the  $\text{H}_2\text{TPPS}^{2-}\text{-FF}^+$  system, and (f) along the z axis in the  $\text{H}_2\text{TPPS}^{2-}\text{-FF}^+$  system. The axes are shown in Figure S2.

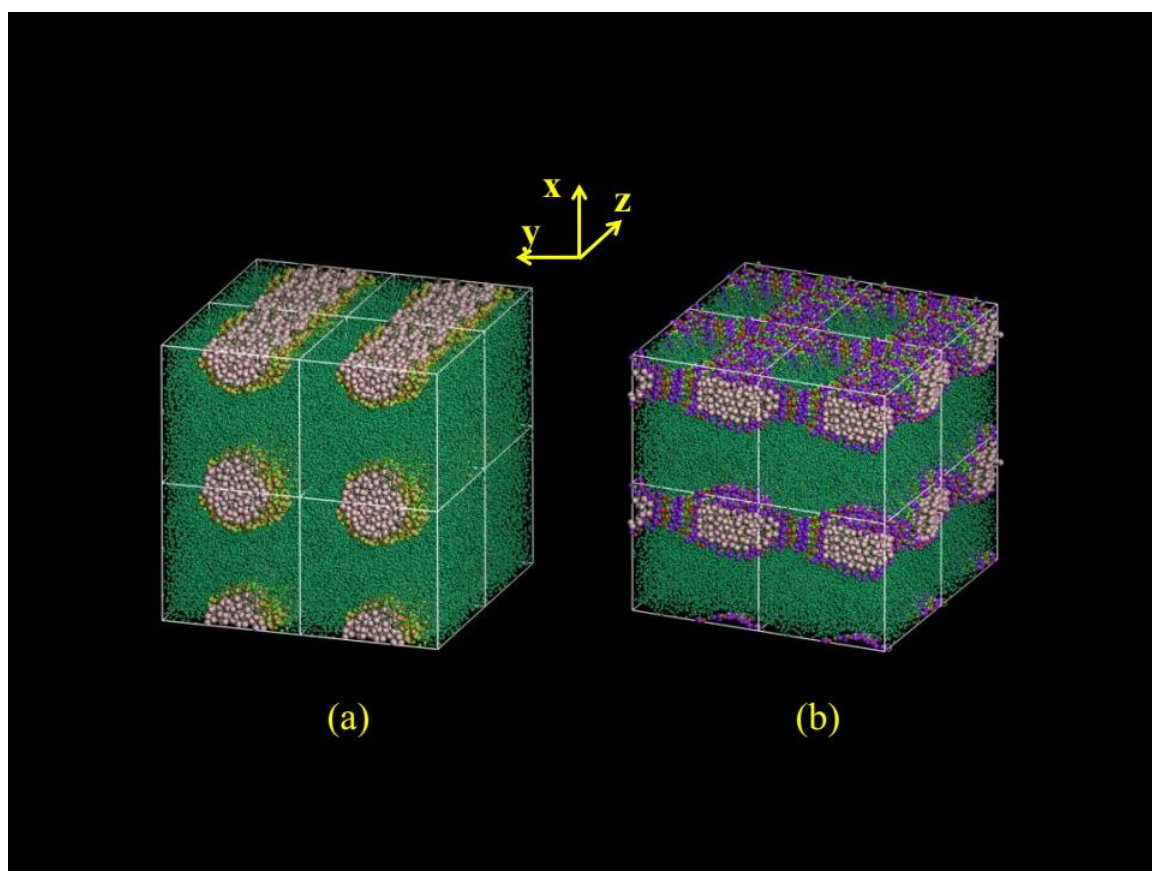

**Figure S4.** Mesoscopic structures of (a)  $\text{H}_2\text{TPPS}^{2-}\text{-KK}^{3+}$  assembly and (b)  $\text{H}_2\text{TPPS}^{2-}\text{-FF}^+$  assembly in aqueous solution.

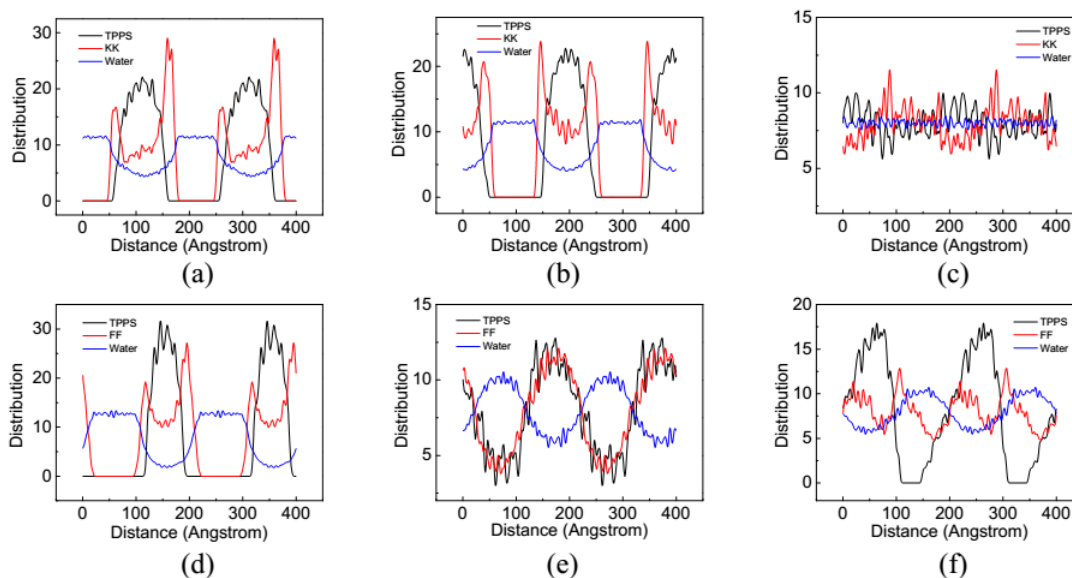

**Figure S5.** Molecular distribution of  $\text{H}_2\text{TPPS}^{2-}$ ,  $\text{KK}^{3+}$  and water along the axis (a)x, (b)y, (c)z in the  $\text{H}_2\text{TPPS}^{2-}$ - $\text{KK}^{3+}$  assembly in aqueous solution, and molecular distribution of  $\text{H}_2\text{TPPS}^{2-}$ ,  $\text{FF}^+$  and water along the axis (d)x, (e)y, (f)z in the  $\text{H}_2\text{TPPS}^{2-}$ - $\text{FF}^+$  assembly in aqueous solution. The axes are shown in Figure S4.

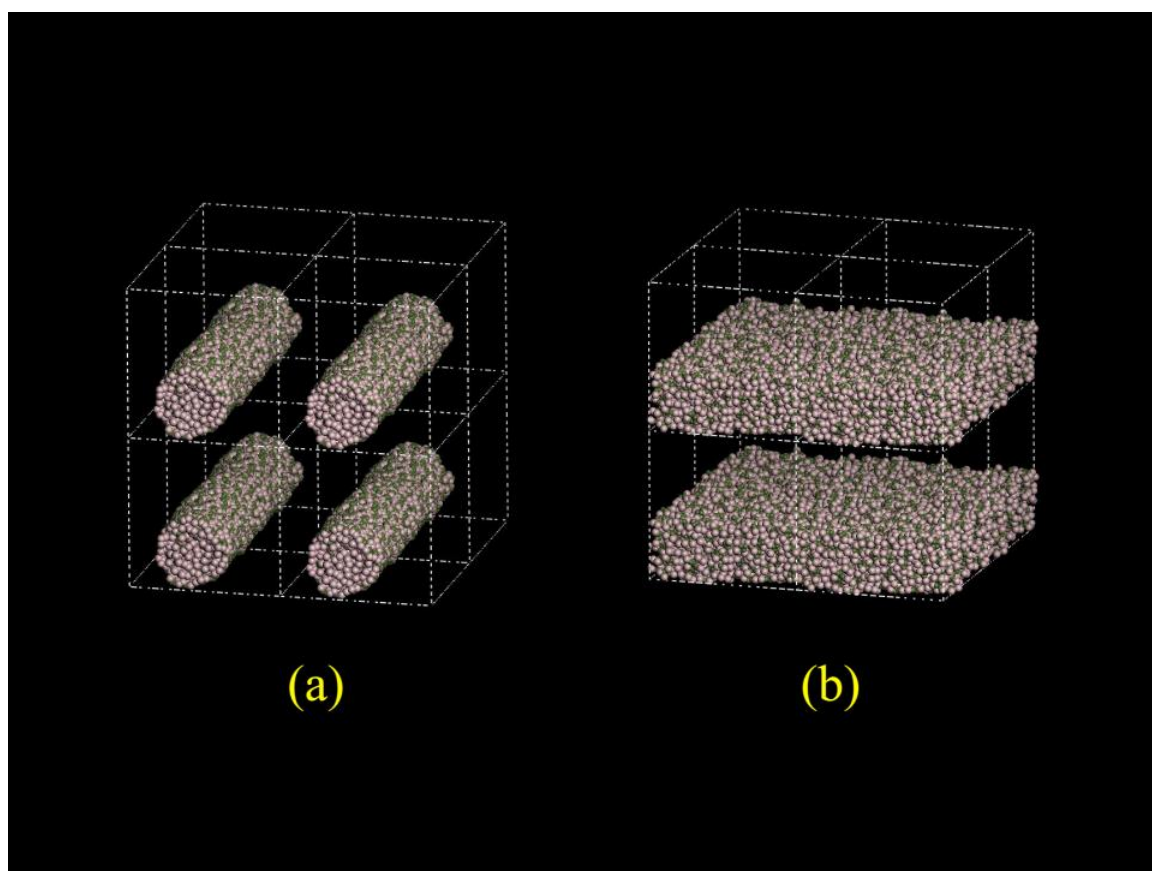

**Figure S6.** Mesoscopic structures of  $\text{H}_2\text{TPPS}^{2-}$  assembly in aqueous solution with a proportion of (a)  $\text{H}_2\text{TPPS}^{2-}$ : water=50:1 and (b)  $\text{H}_2\text{TPPS}^{2-}$ : water = 10:1.
